# Modelling personality, plasticity and predictability in shelter dogs

Conor Goold\*<sup>1</sup> and Ruth C. Newberry<sup>1</sup>

<sup>1</sup>Department of Animal and Aquacultural Sciences, Norwegian University of Life Sciences

June 2, 2017

## Abstract

Behavioural assessments of shelter dogs (*Canis lupus familiaris*) typically comprise standardised test batteries conducted at one time point but test batteries have shown inconsistent predictive validity. Longitudinal behavioural assessments offer an alternative. We modelled longitudinal observational data on shelter dog behaviour using the framework of behavioural reaction norms, partitioning variance into personality (i.e. inter-individual differences in behaviour), plasticity (i.e. individual differences in behavioural change) and predictability (i.e. individual differences in residual intra-individual variation). We analysed data on 3,263 dogs' interactions ( $N = 19,281$ ) with unfamiliar people during their first month after arrival at the shelter. Accounting for personality, plasticity (linear and quadratic trends) and predictability improved the predictive accuracy of the analyses compared to models quantifying personality and/or plasticity only. While dogs were, on average, highly sociable with unfamiliar people and sociability increased over days since arrival, group averages were unrepresentative of all dogs and predictions made at the individual level entailed considerable uncertainty. Effects of demographic variables (e.g. age) on personality, plasticity and predictability were observed. Behavioural repeatability increased with days since arrival. Our results highlight the value of longitudinal assessments on shelter dogs and identify measures that could improve the predictive validity of behavioural assessments in shelters.

**Keywords**— inter- and intra-individual differences, behavioural reaction norms, behavioural repeatability, longitudinal behavioural assessment, human-animal interactions.

---

\*Corresponding author: [conor.gould@nmbu.no](mailto:conor.gould@nmbu.no)

## 28 1 Introduction

29 *Personality*, defined by inter-individual differences in average behaviour, represents just one  
30 component of behavioural variation of interest in animal behaviour research. Personality  
31 frequently describes less than 50% of behavioural variation in animal personality studies [1,  
32 2], leading to the combined analysis of personality with *plasticity*, individual differences in  
33 behavioural change [3], and *predictability*, individual differences in residual intra-individual  
34 variability [4–8]. Understanding these different sources of behavioural variation simultane-  
35 ously can be achieved using the general framework of behavioural reaction norms [3, 5],  
36 which provides insight into how animals react to fluctuating environments through time and  
37 across contexts. More generally, these developments reflect increasing interest across biology  
38 in expanding the ‘trait space’ of phenotypic evolution [9] beyond mean trait differences and  
39 systematic plasticity across environmental gradients to include residual trait variation (e.g.  
40 developmental instability: [10, 11]; stochastic variation in gene expression: [12]).

41 Modest repeatability of behaviour has been documented in domestic dogs (*Canis lupus*  
42 *familiaris*), providing evidence for personality variation. For instance, using meta-analysis,  
43 Fratkin *et al.* [13] found an average Pearson’s correlation of behaviour through time of 0.43,  
44 explaining 19% of the behavioural variance between successive time points. However, the  
45 goal of personality assessments in dogs is often to predict an individual dog’s future behaviour  
46 (e.g. working dogs: [14, 15]; pet dogs: [16]) and, thus, it is important not to confuse the  
47 stability of an individual’s behaviour relative to the behaviour of others with stability of  
48 intra-individual behaviour. That is, individuals could vary their behaviour in meaningful  
49 ways while maintaining differences from other individuals. As illustrated in Figure 1, a  
50 correlation of 0.4 in behaviour across repeated measurements does not preclude individual  
51 heterogeneity in plasticity or predictability. When time-related change in dog behaviour has  
52 been taken into account, behavioural change at the group-level has been of primary focus  
53 (e.g. [16–18]) and no studies have explored the heterogeneity of residual variance within  
54 each dog. The predominant focus on inter-individual differences and group-level patterns of  
55 behavioural change risks obscuring important individual-level heterogeneity and may partly  
56 explain why a number of dog personality assessment tools have been unreliable in predicting  
57 future behaviour [14–16, 19].

58 Of particular concern is the low predictive value of shelter dog assessments for predicting  
59 behaviour post-adoption [20–24], resulting in calls for longitudinal, observational models of  
60 assessment [24]. Animal shelters are dynamic environments and, for most dogs, instigate an  
61 immediate threat to homeostasis as evidenced by heightened hypothalamic-pituitary-adrenal  
62 axis activity and an increase in stress-related behaviours (e.g. [25–28]). Over time, physi-  
63 ological and behavioural responses are amenable to change [17, 27, 29]. Therefore, dogs in  
64 shelters may exhibit substantial heterogeneity in intra-individual behaviour captured neither  
65 by standardised behavioural assessments conducted at one time point [24] nor by group-level  
66 patterns of behavioural change. An additional complication is that the behaviour in shel-  
67 ters may not be representative of behaviour outside of shelters. For example, Patronek and  
68 Bradley [29] suggested that up to 50% of instances of aggression expressed while at a shel-  
69 ter are likely to be false positives. Such false positives may be captured in estimates of  
70 predictability, with individuals departing more from their representative behaviour having

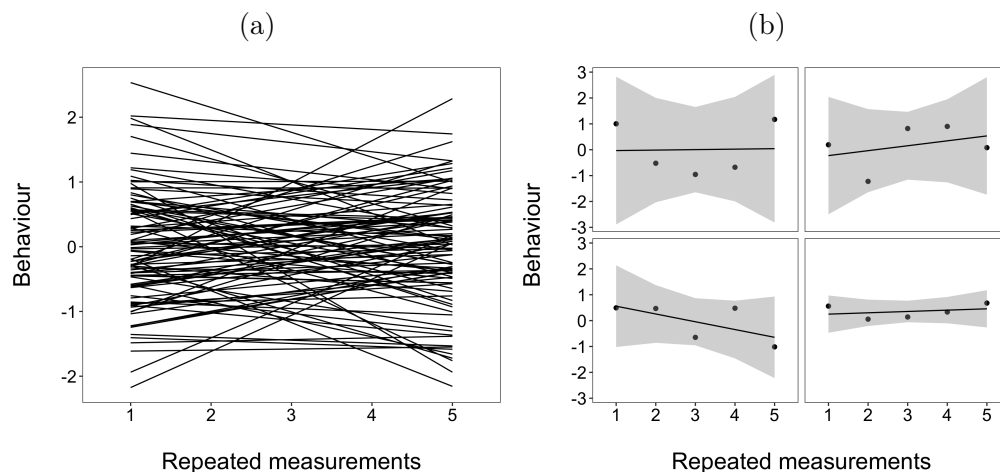

Figure 1: (a) Reaction norms for 100 simulated individuals measured on five occasions, with a correlation of 0.4 between successive time points. (b) Reaction norms and raw data (black points) for four randomly selected individuals; shaded areas represent the residual intra-individual variability or predictability around reaction norm estimates.

71 higher residual intra-individual variability (lower predictability) than others. Overall, abso-  
72 lute values of behaviour, such as mean trait values across time (i.e. personality), may account  
73 for just part of the important behavioural variation needed to understand and predict shelter  
74 dog behaviour. While observational models of assessment have been encouraged, methods  
75 to systematically analyse longitudinal data collected at shelters into meaningful formats are  
76 lacking.

77 In this paper, we demonstrate how the framework of behavioural reaction norms can  
78 quantify inter- and intra-individual differences in shelter dog behaviour. To do so, we use  
79 data on dogs' interactions with unfamiliar people from a longitudinal and observational  
80 shelter assessment. As a core feature of personality assessments, how shelter dogs interact  
81 with unknown people is of great importance. At one extreme, if dogs bite or attempt to  
82 bite unfamiliar people, they are at risk of euthanasia [29]. At the other extreme, even subtle  
83 differences in how dogs interact with potential adopters can influence adoption success [30].  
84 Importantly, neither may all dogs react to unfamiliar people in the same way through time at  
85 the shelter nor may all dogs show the same day-to-day fluctuation of behaviour around their  
86 average behavioural trajectories. These considerations can be examined with behavioural  
87 reaction norms.

88 The analysis of behavioural reaction norms is dependent on the use of hierarchical sta-  
89 tistical models for partitioning variance among individuals [3, 5, 6]. Given that ordinal  
90 data are common in behavioural research, here, we illustrate how similar hierarchical mod-  
91 els can be applied to ordinal data using a Bayesian framework (see also [31]). Apart from  
92 distinguishing inter- from intra-individual variation, we place particular emphasis on two  
93 desirable properties of the hierarchical modelling approach taken here. First, the property  
94 of *hierarchical shrinkage* [32] offers an efficacious way of making inferences about individual-  
95 level behaviour when data are highly unbalanced and potentially unrepresentative of a dog's  
96 typical behaviour. When data are sparse for certain individuals, hierarchical shrinkage will

97 attenuate their estimates to the group-level estimates. Similarly, if data are unrepresenta-  
98 tive of group-level patterns, estimates will be more informed by group-level estimates unless  
99 there is sufficient contradictory information. Secondly, since any prediction of future (dog)  
100 behaviour will entail uncertainty, a Bayesian approach is attractive because it allows the  
101 quantification of uncertainty at all levels of analysis [32, 33]. Understanding the uncertainty  
102 around individual-level reaction norms is important for making logical predictions about  
103 future behaviour.

## 104 2 Material & Methods

### 105 2.1 Subjects

106 Behavioural data on  $N = 3,263$  dogs from Battersea Dogs and Cats Home’s longitudinal,  
107 observational assessment model were used for analysis. The data concerned all behavioural  
108 records of dogs at the shelter during 2014 (including those arriving in 2013 or departing  
109 in 2015), filtered to include all dogs: 1) at least 4 months of age (to ensure all dogs were  
110 treated similarly under shelter protocols, e.g. vaccinated so eligible for walks outside and  
111 kennelled in similar areas), 2) with at least one observation during the first 31 days since  
112 arrival at the shelter, and 3) with complete data for demographic variables to be included  
113 in the formal analysis (Table 1). Since dogs spent approximately one month at the shelter  
114 on average (Table 1), we focused on this period in our analyses (arrival day 0 to day 30).  
115 We did not include breed characterisation due to the unreliability of using appearance to  
116 attribute breed type to shelter dogs of uncertain heritage [34].

### 117 2.2 Shelter environment

118 Details of the shelter environment have previously been presented in [35]. Briefly, the shelter  
119 was composed of three different rehoming centres (Table 1): one large inner-city centre based  
120 in London (approximate capacity: 150-200 dogs), a medium-sized suburban/rural centre  
121 based in Old Windsor (approximate capacity: 100-150 dogs), and a smaller rural centre in  
122 Brands Hatch (approximate capacity: 50 dogs). Dogs considered suitable for adoption were

Table 1: *Demographic variables of dogs in the sample analysed. Mean and standard deviation (SD) or the number of dogs by category (N) are displayed.*

| <b>Demographic variable</b>                                | <b>Mean (SD) / N</b>    |
|------------------------------------------------------------|-------------------------|
| Number of observations per dog                             | 5.9 (3.7)               |
| Days spent at the shelter                                  | 25.8 (35.0)             |
| Age (years; all at least 4 months old)                     | 3.7 (3.0)               |
| Weight (kg)                                                | 18.9 (10.2)             |
| Source: gift / stray / return                              | 1950 / 1122 / 191       |
| Rehoming centre: London / Old Windsor / Brands Hatch       | 1873 / 951 / 439        |
| Females / males                                            | 1396 / 1867             |
| Neutered: before arrival / at shelter / not / undetermined | 1043 / 1281 / 747 / 192 |

123 housed in indoor kennels (typically about 4m x 2m, with a shelf and bedding alcove; see also  
124 [36]). Most dogs were housed individually, and given daily access to an indoor run behind  
125 their kennel. Feeding, exercising and kennel cleaning were performed by a relatively stable  
126 group of staff members. Dogs received water ad libitum and two meals daily according to  
127 veterinary recommendations. Sensory variety was introduced daily (e.g. toys, essential oils,  
128 classical music, access to quiet ‘chill-out’ rooms). Regular work hours were from 0800 h to  
129 1700 h each day, with public visitation from 1000 h to 1600 h. Unless deemed unsafe, dogs  
130 were socialised with staff and/or volunteers daily.

## 131 2.3 Data collection

132 The observational assessment implemented at the shelter included observations of dogs by  
133 trained shelter employees in different, everyday contexts, each with its own ethogram of  
134 possible behaviours. Shortly after dogs were observed in relevant contexts, employees entered  
135 observations into a custom, online platform using computers located in different housing  
136 areas. Each behaviour within a context had its own code. Previously, we have reported on  
137 aggressive behaviour across contexts [35]. Here, we focus on variation in behaviour in one of  
138 the most important contexts, ‘Interactions with unfamiliar people’, which pertained to how  
139 dogs reacted when people with whom they had never interacted before approached, made eye  
140 contact, spoke to and/or attempted to make physical contact with them. For the most part,  
141 this context occurred outside of the kennel, but it could also occur if an unfamiliar person  
142 entered the kennel. Observations could be recorded by an employee meeting an unfamiliar  
143 dog, or by an employee observing a dog meeting an unfamiliar person.

144 Behavioural observations in the ‘Interactions with unfamiliar people’ context were recorded  
145 using a 13-code ethogram (Table 2). Each behavioural code was subjectively labelled and  
146 generally defined, providing a balance between behavioural rating and behavioural coding  
147 methodologies. The ethogram represented a scale of behavioural problem severity and as-  
148 sumed adoptability (higher codes indicating higher severity of problematic behaviour/lower  
149 sociability), reflected by grouping the 13 codes further into green, amber and red codes  
150 (Table 2). Green behaviours posed no problems for adoption, amber behaviours suggested  
151 dogs may require some training to facilitate successful adoption but did not pose a danger  
152 to people or other dogs, and red behaviours suggested dogs needed training or behavioural  
153 modification to facilitate successful adoption and could pose a risk to people or other dogs. A  
154 dog’s suitability for adoption was, however, based on multiple behavioural observations over  
155 a number of days. When registering an observation, the employee selected the highest code  
156 in the ethogram that was observed on that occasion (i.e. the most severe level of problematic  
157 behaviour was given priority). There were periods when a dog could receive no entries for  
158 the context for several days but other times when multiple observations were recorded on the  
159 same day, usually when a previous observation was followed by a more serious behavioural  
160 event. In these instances, and in keeping with the shelter protocol, we retained the highest  
161 (i.e. most severe) behavioural code registered for the context that day. When the behaviours  
162 were the same, only one record was retained for that day. This resulted in an average of 5.9  
163 (SD = 3.7) records per dog on responses during interactions with unfamiliar people while  
164 at the shelter. For dogs with more than one record, the average number of days between  
165 records was 2.8 (SD = 2.2).

Table 2: *Ethogram of behavioural codes used to record observations of interactions with unfamiliar people, and their percent prevalence in the sample. Behaviour labels followed by + indicate a more intense form of the behaviour with the same name without a +.*

| <b>Behaviour</b>                   | <b>Colour</b> | <b>%</b> | <b>Definition</b>                                                                                                                                                                   |
|------------------------------------|---------------|----------|-------------------------------------------------------------------------------------------------------------------------------------------------------------------------------------|
| 1: Friendly                        | Green         | 63.5     | Dog initiates interactions with people in an appropriate social manner.                                                                                                             |
| 2: Excitable                       | Green         | 14.2     | Animated interaction with an enthusiastic attitude, showing behaviours such as jumping up, mouthing, an inability to stand still, and/or playful behaviour towards people.          |
| 3: Independent                     | Green         | 4.1      | Does not actively seek interaction, although relaxed in the presence of people                                                                                                      |
| 4: Submissive                      | Green         | 4.6      | Appeasing and/or nervous behaviours, including a low body posture, rolling over and other calming signals.                                                                          |
| 5: Uncomfortable avoids            | Amber         | 5.4      | Tense and stiff posture, and/or shows anxious behaviours (e.g. displacement behaviours) while trying to move away from the person.                                                  |
| 6: Submissive +                    | Amber         | 0.2      | High intensity of submissive behaviours such as submissive urination, a reluctance to move, or is frequently overwhelmed by the interaction.                                        |
| 7: Uncomfortable static            | Amber         | 0.8      | Tense and stiff posture, and/or shows anxious behaviour (potentially showing displacement behaviours) but doesn't move away from the person.                                        |
| 8: Stressed                        | Amber         | 0.5      | High frequency/intensity of stress behaviours, which may include dribbling, stereotypic behaviours, stress vocalisations, constant shedding, trembling, and destructive behaviours. |
| 9: Reacts to people non-aggressive | Amber         | 2.4      | Barks, whines, howls and/or play growls when seeing/meeting people, potentially pulling or lunging towards them.                                                                    |
| 10: Uncomfortable approaches       | Amber         | 0.7      | Tense and stiff posture, and/or shows anxious behaviour (potentially showing displacement behaviours) and approaches the person.                                                    |
| 11: Overstimulated                 | Red           | 0.8      | High intensity of excitable behaviour, including grabbing, body barging, and nipping.                                                                                               |
| 12: Uncomfortable static +         | Red           | 0.1      | Body freezes (the body goes suddenly and completely still) in response to an interaction with a person.                                                                             |
| 13: Reacts to people aggressive    | Red           | 2.8      | Growls, snarls, shows teeth and/or snaps when seeing/meeting people, potentially pulling or lunging towards them.                                                                   |



## 166 2.4 Validity & inter-rater reliability

167 Inter-rater reliability and the validity of the assessment methodology were evaluated using  
168 data from a larger research project at the shelter. Videos depicting different behaviours  
169 in different contexts were filmed by canine behaviourists working at the shelter, who subse-  
170 quently organised video coding sessions with 93 staff members (each session with about 5 - 10  
171 participants) across rehoming centres [35]. The authors were blind to the videos and admin-  
172 istration of video coding sessions. The staff members were shown 14 videos (each about 30  
173 s long) depicting randomly-selected behaviours, two from each of seven different assessment  
174 contexts (presented in a pseudo-random order, the same for all participants). Directly after  
175 watching each video, they individually recorded (on a paper response form) which ethogram  
176 code best described the behaviour observed in each context. Two videos depicted behaviour  
177 during interactions with people (familiar versus unfamiliar not differentiated), one demon-  
178 strating *Reacts to people aggressive* and the other *Reacts to people non-aggressive* (Table  
179 2). Below, we present the inter-rater reliabilities and the percentage of people who chose  
180 the correct behaviour and colour category for these two videos in particular, but also the  
181 averaged results across the 14 videos, since there was some redundancy between ethogram  
182 scales across contexts.

## 183 2.5 Statistical analyses

184 All data analysis was conducted in R version 3.3.2 [37].

### 185 2.5.1 Validity & inter-rater reliability

186 Validity was assessed by calculating the percentage of people answering with the correct  
187 ethogram code/code colour for each video. Inter-rater reliability was calculated for each  
188 video using the consensus statistic [38] in the R package *agrmt* [39], which is based on  
189 Shannon entropy and assesses the amount of agreement in ordered categorical responses. A  
190 value of 0 implies complete disagreement (i.e. responses equally split between the lowest  
191 and highest ordinal categories, respectively) and a value of 1 indicates complete agreement  
192 (i.e. all responses in a single category). For the consensus statistic, 95% confidence intervals  
193 (CIs) were obtained using 10,000 non-parametric bootstrap samples. The confidence intervals  
194 were subsequently compared to 95% CIs of 10,000 bootstrap sample statistics from a null  
195 distribution, which was created by: 1) selecting the range of unique answers given for a  
196 particular video and 2) taking 10,000 samples of the same size as the real data, where  
197 each answer had equal probability of being chosen. Thus, the null distribution represented  
198 a population with a realistic range of answers, but had no clear consensus about which  
199 category best described the behaviour. When the null and real consensus statistics' 95% CIs  
200 did not overlap, we inferred statistically significant consensus among participants.

### 201 2.5.2 Hierarchical Bayesian ordinal probit model

202 The distribution of ethogram categories was heavily skewed in favour of the green codes  
203 (Table 2), particularly the first *Friendly* category. Since some categories were chosen par-  
204 ticularly infrequently, we aggregated the raw responses into a 6-category scale: 1) *Friendly*,

205 2) *Excitable*, 3) *Independent*, 4) *Submissive*, 5) *Amber codes*, 6) *Red codes*. This aggregated  
206 scale retained the main variation in the data and simplified the data interpretation. We  
207 analysed the data using a Bayesian ordinal probit model (described in [32, 40]), but ex-  
208 tended to integrate the hierarchical structure of the data, including heteroscedastic residual  
209 standard deviations to quantify predictability for each dog (for related models, see [31, 41,  
210 42]). The ordinal probit model, also known as the cumulative or thresholded normal model,  
211 is motivated by a latent variable interpretation of the ordinal scale. That is, an ordinal  
212 dependent variable,  $Y$ , with categories  $K_j$ , from  $j = 1$  to  $J$ , is a realisation of an underlying  
213 continuous variable divided into thresholds,  $\theta_c$ , for  $c = 1$  to  $J - 1$ . Under the probit model,  
214 the probability of each ordinal category is equal to its area under the cumulative normal  
215 distribution,  $\phi$ , with mean,  $\mu$ , SD  $\sigma$  and thresholds  $\theta_c$ :

$$Prob(Y = K | \mu, \sigma, \theta_c) = \phi\left[\frac{\theta_c - \mu}{\sigma}\right] - \phi\left[\frac{\theta_{c-1} - \mu}{\sigma}\right] \quad (1)$$

216 For the first and last categories, this simplifies to  $\phi[(\theta_c - \mu)/\sigma]$  and  $1 - \phi[(\theta_{c-1} - \mu)/\sigma]$ , re-  
217 spectively. As such, the latent scale extends from  $\pm\infty$ . Here, the ordinal dependent variable  
218 was a realisation of the hypothesised continuum of ‘sociability when meeting unfamiliar peo-  
219 ple’, with 6 categories and 5 threshold parameters. While ordinal regression models usually  
220 fix the mean and SD of the latent scale to 0 and 1 and estimate the threshold parameters,  
221 we fixed the first and last thresholds to 1.5 and 5.5 respectively, allowing for the remaining  
222 thresholds, and the mean and SD, to be estimated from the data. As explained by Kruschke  
223 [32], this allows for the results to be interpretable with respect to the ordinal scale. We  
224 present the results using both the predicted probabilities of ordinal sociability codes and  
225 estimates on the latent, unobserved scale assumed to generate the ordinal responses.

### 226 2.5.3 Hierarchical structure

227 To model inter- and intra-individual variation, a hierarchical structure for both the mean  
228 and SD was specified. That is, parameters were included for both group-level and dog-level  
229 effects. The mean model, describing the predicted pattern of behaviour across days on the  
230 latent scale,  $y^*$ , for observation  $i$  from dog  $j$ , was modelled as:

$$y_{ij}^* = \beta_0 + \nu_{0j} + \sum_{p=1}^P \beta_{p0} x_{pj} + (\beta_1 + \nu_{1j} + \sum_{p=1}^P \beta_{p1} x_{pj}) day_{ij} + (\beta_2 + \nu_{2j} + \sum_{p=1}^P \beta_{p2} x_{pj}) day_{ij}^2 \quad (2)$$

231 Equation 2 expresses the longitudinal pattern of behaviour as a function of i) a group-  
232 level intercept the same for all dogs,  $\beta_0$ , and the deviation from the group-level intercept for  
233 each dog,  $\nu_{0j}$ , ii) a linear effect of day since arrival,  $\beta_1$ , and each dog’s deviation,  $\nu_{1j}$ , and iii)  
234 a quadratic effect of day since arrival,  $\beta_2$ , and each dog’s deviation,  $\nu_{2j}$ . A quadratic effect  
235 was chosen based on preliminary plots of the data at group-level and at the individual-level,  
236 although we also compared the model’s predictive accuracy with simpler models (described  
237 below). Day since arrival was standardised, meaning that the intercepts reflected the be-  
238 haviour on the average day since arrival across dogs (approximately day 8). The three  
239 dog-level parameters,  $\nu_j$ , correspond to personality and linear and quadratic plasticity pa-  
240 rameters, respectively. The terms  $\sum_{p=1}^P \beta_p x_{pj}$  denote the effect of  $P$  dog-level predictor



241 variables ( $x_p$ ), included to explain variance between dog-level intercepts and slopes. These  
 242 included: the number of observations for each dog, the number of days dogs spent at the shel-  
 243 ter controlling for the number of observations (i.e. the residuals from a linear regression of  
 244 total number of days spent at the shelter on the number of observations), average age while at  
 245 the shelter, average weight at the shelter, sex, neuter status, source type, and rehoming cen-  
 246 tre (Table 1). For neuter status, we did not make comparisons between the ‘undetermined’  
 247 category and other categories. The primary goal of including these predictor variables was to  
 248 obtain estimates of individual differences conditional on relevant inter-individual differences  
 249 variables, since the data were observational.

250 The SD model was:

$$\sigma = \exp\left(\delta + \nu_{3j} + \sum_{p=1}^P \beta_{p3} x_{pj}\right) \quad (3)$$

251 Equation 3 models the SD of the latent scale by its own regression, with group-level SD  
 252 intercept,  $\delta$ , the deviation for each dog from the group-level SD intercept,  $\nu_{3j}$ , and predictor  
 253 variables,  $\sum_{p=1}^P \beta_{p3} x_{pj}$ , as in the mean model (equation 2). The SDs across dogs were as-  
 254 sumed to approximately follow a log-normal distribution, with  $\ln(\sigma)$  approximately normally  
 255 distributed (hence the exponential inverse-link function). The parameter  $\nu_{3j}$  corresponds to  
 256 each dog’s residual SD or predictability.

257 All four dog-level parameters were assumed to be multivariate normally distributed with  
 258 means 0 and variance-covariance matrix  $\Sigma_{\nu}$  estimated from the data:

$$\Sigma_{\nu} = \begin{bmatrix} \tau_{\nu_0}^2 & \rho_{\nu_0} \tau_{\nu_0} \tau_{\nu_1} & \rho_{\nu_0} \tau_{\nu_0} \tau_{\nu_2} & \rho_{\nu_0} \tau_{\nu_0} \tau_{\nu_3} \\ \cdots & \tau_{\nu_1}^2 & \rho_{\nu_1} \tau_{\nu_1} \tau_{\nu_2} & \rho_{\nu_1} \tau_{\nu_1} \tau_{\nu_3} \\ \cdots & \cdots & \tau_{\nu_2}^2 & \rho_{\nu_2} \tau_{\nu_2} \tau_{\nu_3} \\ \cdots & \cdots & \cdots & \tau_{\nu_3}^2 \end{bmatrix} \quad (4)$$

259 The diagonal elements are the variances of the dog-level intercepts, linear slopes, quadratic  
 260 slopes and residual SDs, respectively, while the covariances fill the off-diagonal elements (only  
 261 the upper triangle shown), where  $\rho$  is the correlation coefficient. In the results, we report  
 262  $\tau_{\nu_3}$  (the SD of dog-level residual SDs) on the original scale, rather than the log-transformed  
 263 scale, using  $\sqrt{e^{2\delta + \tau_{\nu_3}^2} e^{\tau_{\nu_3}^2} - 1}$ . Likewise,  $\delta$  was transformed to the median of the original scale  
 264 by  $e^{\delta}$ .

265 To summarise the amount of behavioural variation explained by differences between in-  
 266 dividuals, referred to as repeatability in the personality literature [1], we calculated the  
 267 intra-class correlation coefficient (ICC). Since the model includes both intercepts and slopes  
 268 varying by dog, the ICC is a function of both linear and quadratic effects of day since ar-  
 269 rival. The ICC for day  $i$ , assuming individuals with the same residual variance (i.e. using  
 270 the median of the log-normal residual SD), was calculated as:

$$ICC_i = \frac{\tau_{\nu_0}^2 + 2Cov_{\nu_0, \nu_1} Day_i^2 + 2Cov_{\nu_0, \nu_2} Day_i^2 + \tau_{\nu_2}^2 Day_i^4 + 2Cov_{\nu_1, \nu_2} Day_i^3}{numerator + e^{\delta}} \quad (5)$$

271 Equation 5 is an extension of the intra-class correlation calculated from mixed-effect  
 272 models with a random intercept only [43] to include the variance parameters for, and covari-  
 273 ances between, the linear and quadratic effects of day, which were evaluated at specific days

274 of interest. We calculated the ICC for values of -1, 0 and 1 on the standardised day scale,  
275 corresponding to approximately the arrival day (day 0), day 8, and day 15. This provided  
276 a representative spread of days for most of the dogs in the sample, since there were fewer  
277 data available for later days which could lead to inflation of inter-individual differences. To  
278 inspect how much the rank-order differences between dogs changed from arrival day com-  
279 pared to later days, we calculated the ‘cross-environmental’ correlations [44] between the  
280 same days as the ICC. Although correlations between intercept and slope parameters pro-  
281 vide some indication of the amount of crossing between individuals’ reaction norms through  
282 time, the cross-environmental correlation offers a more direct measure of rank-order change  
283 across particular environments, where ‘days since arrival’ is, here, a special case of differing  
284 ‘environments’ [44]. The cross-environmental covariance matrix,  $\Omega$ , between the three focal  
285 days was calculated as:

$$\Omega = \Psi \mathbf{K} \Psi^T \quad (6)$$

286 In equation 6,  $\mathbf{K}$  represents the variance-covariance matrix of the dog-level intercepts and  
287 (linear and quadratic) slopes, and  $\Psi$  is a three-by-three matrix with a column vector of 1s  
288 and two column vectors containing -1, 0 and 1 (defining the days for the cross-environmental  
289 correlations). Once defined,  $\Omega$  was scaled to a correlation matrix. Finally, to summarise the  
290 degree of individual differences in predictability, we calculated the ‘coefficient of variation  
291 for predictability’ as  $\sqrt{e^{\tau_{v_3}^2} - 1}$  following Cleasby *et al.* [5].

#### 292 2.5.4 Prior distributions

293 We chose prior distributions that were either weakly informative (i.e. specified a realistic  
294 range of parameter values) for computational efficiency, or weakly regularising to prioritise  
295 conservative inference. The prior for the overall intercept,  $\beta_0$ , was  $Normal(\bar{y}, 5)$ , where  $\bar{y}$  is  
296 the arithmetic mean of the ordinal data. The linear and quadratic slope parameters,  $\beta_1$  and  
297  $\beta_2$ , were given  $Normal(0, 1)$  priors. Coefficients for the dog-level predictor variables,  $\beta_k$ , were  
298 given  $Normal(0, \sigma_{\beta_p})$  priors, where  $\sigma_{\beta_p}$  was a shared SD across predictor variables, which  
299 had in turn a half-Cauchy hyperprior with mode 0 and shape parameter 2,  $half-Cauchy(0, 2)$ .  
300 Using a shared SD imposes shrinkage on the regression coefficients for conservative inference:  
301 when most regression coefficients are near zero, then estimates for other regression coefficients  
302 are also pulled towards zero (e.g. [32]). The prior for the overall log-transformed residual  
303 SD,  $\delta$ , was  $Normal(0, 1)$ . The covariance matrix of the random effects was parameterised  
304 as a Cholesky decomposition of the correlation matrix (see [45] for more details), where the  
305 SDs had  $half-Cauchy(0, 2)$  priors and the correlation matrix had a LKJ prior distribution  
306 [46] with shape parameter  $\eta$  set to 2.

#### 307 2.5.5 Model selection & computation

308 We compared the full model explained above to five simpler models. Starting with the full  
309 model, the alternative models included: i) parameters quantifying personality and quadratic  
310 and linear plasticity only; ii) parameters quantifying personality and linear plasticity only,  
311 with a fixed quadratic effect of day since arrival; iii) parameters quantifying personality  
312 only, with fixed linear and quadratic effects of day since arrival; iv) parameters quantifying

313 personality only, with a fixed linear effect of day since arrival; and v) a generalised linear  
314 regression with no dog-varying parameters and a linear fixed effect for day since arrival  
315 (Figure 2). Models were compared by calculating the widely applicable information criterion  
316 (WAIC; [47]) following McElreath [33] (see [the R script file](#)). The WAIC is a fully Bayesian  
317 information criterion that indicates a model's *out-of-sample* predictive accuracy relative to  
318 other plausible models while accounting for model complexity. Thus, WAIC guards against  
319 both under- and over-fitting to the data (unlike measures of purely in-sample fit, e.g.  $R^2$ ).

320 Models were computed using the probabilistic programming language Stan [45] using the  
321 *RStan* package [48] version 2.15.1, which employs Markov chain Monte Carlo estimation  
322 using Hamiltonian Monte Carlo (see [the R script file and Stan code for full details](#)). We  
323 ran four chains of 5,000 iterations each, discarding the first 2,500 iterations of each chain as  
324 warm-up, and setting thinning to 1. Convergence was assessed visually using trace plots to  
325 ensure chains were well mixed, numerically using the Gelman-Rubin statistic (values close  
326 to 1 and  $< 1.05$  indicating convergence) and by inspecting the effective sample size of each  
327 parameter. We also used graphical posterior predictive checks to assess model predictions  
328 against the raw data, including 'counterfactual' predictions [33] to inspect how dogs would be  
329 predicted to behave across the first month of being in the shelter regardless of their actual  
330 number of observations or length of stay at the shelter. To summarise parameter values,  
331 we calculated mean (denoted  $\beta$ ) and 95% highest density intervals (HDI), the 95% most  
332 probable values for each parameter (using functions in the *rethinking* package; [33]). For  
333 comparing levels of categorical variables, the 95% HDI of their differences were calculated  
334 (i.e. the differences between the coefficients at each step in the MCMC chain, denoted  $\beta_{diff}$ ).  
335 When the 95% HDI of predictor variables surpassed zero, a credible effect was inferred.

## 336 3 Results

### 337 3.1 Inter-rater reliability & validity

338 For the two videos depicting interactions with people, consensus was 0.75 (95% CI: 0.66,  
339 0.84) for the video showing an example of *Reacts to people non-aggressive* and 0.77 (95%  
340 CI: 0.74, 0.81) for the example of *Reacts to people aggressive*, respectively. Neither did these  
341 results overlap with the null distributions (see [Supplementary Material Table S1](#)), indicating  
342 significant inter-rater reliability. For the video showing *Reacts to people non-aggressive*,  
343 77% chose the correct code and 83% a code of the correct colour category (amber), and,  
344 as previously reported by [35], 52% chose the correct code for the video showing *Reacts to*  
345 *people aggressive* and 55% chose a code of the correct colour category (red; 42% chose the  
346 amber code *Reacts to people non-aggressive* instead). Across all assessment context videos,  
347 the average consensus was 0.71 and participants chose the correct ethogram category 66%  
348 of the time while 78% of answers were a category of the correct ethogram colour.

### 349 3.2 Hierarchical ordinal probit model

350 The full model had the best out-of-sample predictive accuracy, with the inclusion of hetero-  
351 geneous residual SDs among dogs improving model fit by over 1,500 WAIC points compared

352 to the second most plausible model (Alternative 1 in Figure 2). In general, models that  
353 included more parameters to describe personality, plasticity and predictability, and models  
354 with a quadratic effect of day, had better out-of-sample predictive accuracy, despite the  
355 added complexity brought by additional parameters.

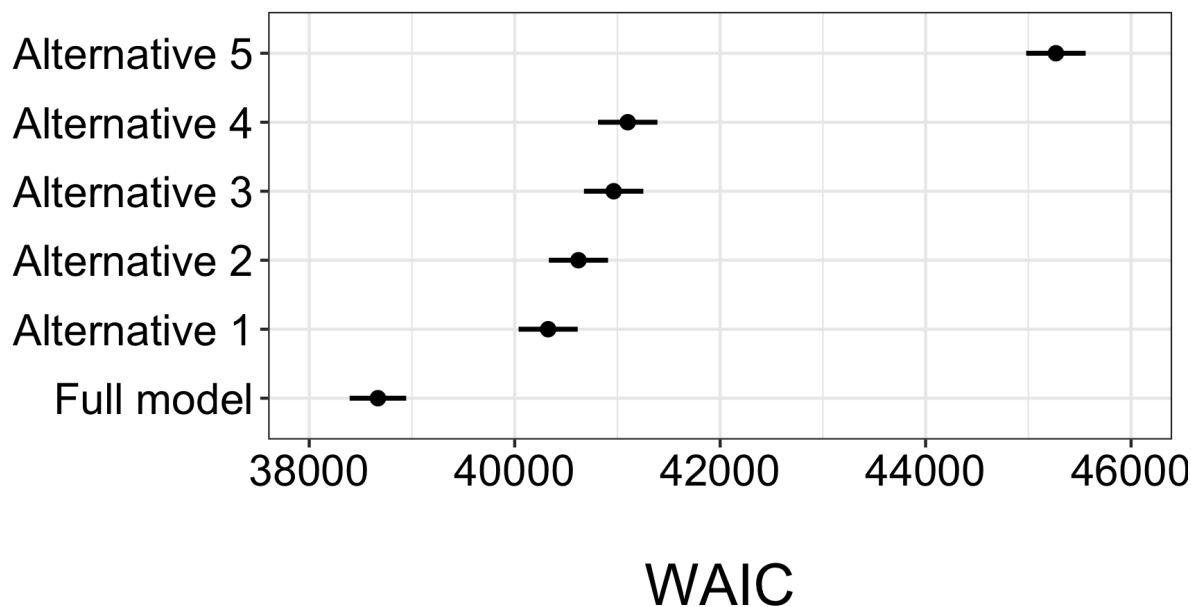

Figure 2: Out-of-sample predictive accuracy (lower is better) for each model (described in text section 2.5.5) measured by the widely applicable information criterion (WAIC). Black points denote the WAIC estimate and horizontal lines show WAIC estimates  $\pm$  standard error. Mean  $\pm$  standard error: full model =  $38669 \pm 275$ ; alternative 1 =  $40326 \pm 288$ ; alternative 2 =  $40621 \pm 288$ ; alternative 3 =  $40963 \pm 289$ ; alternative 4 =  $41100 \pm 289$ ; alternative 5 =  $45268 \pm 289$ .

356 At the group-level, the *Friendly* code (Table 2) was most probable overall and was es-  
357 timated to increase in probability across days since arrival, while the remaining sociability  
358 codes either decreased or stayed at low probabilities (Figure 3a), reflecting the raw data.  
359 On the latent sociability scale (Figure 3b), the group-level intercept parameter on the av-  
360 erage day was 0.68 (95% HDI: 0.51, 0.86). A one SD increase in the number of days since  
361 arrival was associated with a -0.63 unit (95% HDI: -0.77, -0.50) change on the latent scale  
362 on average (i.e. reflecting increasing sociability), and the group-level quadratic slope was  
363 positive ( $\beta = 0.20$ , 95% HDI: 0.10, 0.30), reflecting a quicker rate of change in sociability  
364 earlier after arrival to the shelter than later (i.e. a concave down parabola). There was a  
365 slight increase in the quadratic curve towards the end of the one-month period, although  
366 there were fewer behavioural observations at this point and so greater uncertainty about the  
367 exact shape of the curve, resulting in estimates being pulled closer to those of the intercepts.  
368 The group-level residual standard deviation had a median of 1.84 (95% HDI: 1.67, 2.02).

369 At the individual level, heterogeneity existed in behavioural trajectories across days since  
370 arrival (Figure 3b). The SDs of dog-varying parameters were: i) intercepts: 1.29 (95% HDI:  
371 1.18, 1.41; Figure 4a), ii) linear slopes: 0.56 (95% HDI: 0.47, 0.65; Figure 4b), iii) quadratic

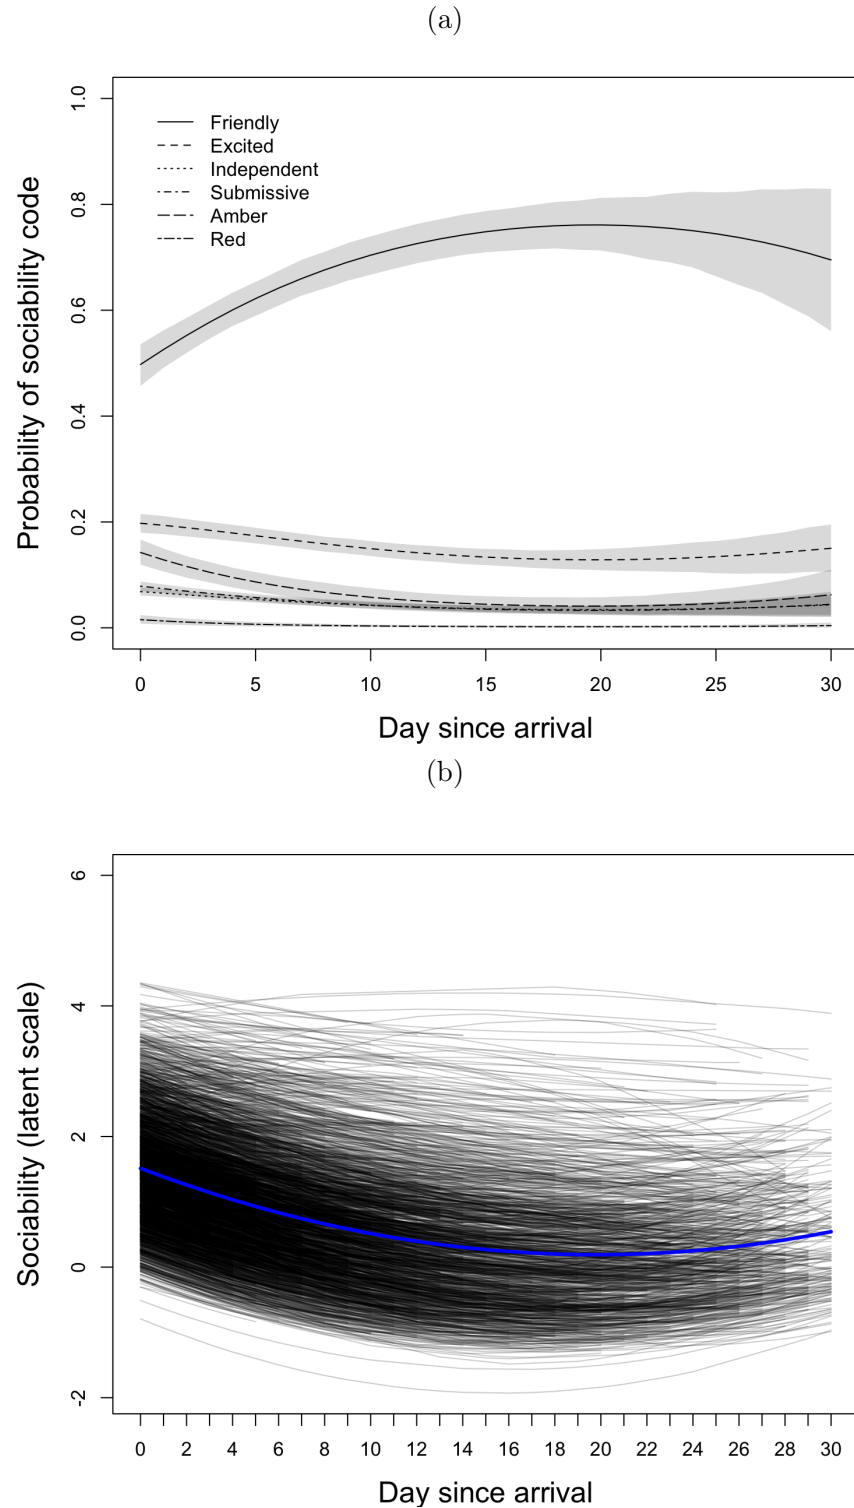

Figure 3: (a) Predicted probabilities (posterior means = black lines; 95% highest density intervals = shaded areas) of different sociability codes across days since arrival. (b) Posterior mean behavioural trajectories on the latent scale (ranging from  $\pm\infty$ ) at the group-level (blue line) and for each individual (black lines), where higher values indicate lower sociability.



372 slopes: 0.28 (95% HDI: 0.20, 0.35; Figure 4c), and iv) residual SDs: 1.39 (95% HDI: 1.22,  
373 1.58; Figure 4d). There was also large uncertainty in individual-level estimates. Figure 5  
374 displays counterfactual model predictions for twenty randomly-sampled dogs. Uncertainty  
375 in reaction norm estimates, illustrated by the width of the 95% HDIs (dashed black lines),  
376 was greatest when data were sparse (e.g. towards the end of the one-month study period).  
377 Hierarchical shrinkage meant that individuals with observations of less sociable responses,  
378 or individuals with few behavioural observations, tended to have model predictions pulled  
379 towards the overall mean. Note that regression lines depict values on the latent scale pre-  
380 dicted to generate observations on the ordinal scale, and so may not clearly fit the ordinal  
381 data points. The coefficient of variation for predictability was 0.64 (95% HDI: 0.58, 0.70).  
382 Individuals with the five highest and lowest residual SD estimates are shown in Figure 6.

383 Dog-varying intercepts positively correlated with linear slope parameters ( $\rho = 0.38$ , 95%  
384 HDI: 0.24, 0.50) and negatively correlated with quadratic slope parameters ( $\rho = -0.54$ , 95%  
385 HDI: -0.68, -0.39), and linear and quadratic slopes had a negative correlation ( $\rho = -0.75$ , 95%  
386 HDI: -0.88, -0.59), indicating that less sociable individuals (with higher scores on the ordinal  
387 scale) had flatter reaction norms on average. Dog-varying residual SDs had a correlation  
388 with the intercept parameters of approximately zero ( $\rho = 0.00$ , 95% HDI: -0.10, 0.10) but  
389 were negatively correlated with the linear slope parameters ( $\rho = -0.37$ , 95% HDI: -0.51,  
390 -0.22) and positively correlated with the quadratic slopes ( $\rho = 0.24$ , 95% HDI: 0.05, 0.42),  
391 indicating that dogs with greater residual SDs were predicted to change the most across days  
392 since arrival.

393 The ICC by day increased through time, ranging from 0.18 (95% HDI: 0.11, 0.24) on  
394 day 0 (arrival day) to 0.33 (95% HDI: 0.28, 0.38) on day 8 to 0.35 (95% HDI: 0.30, 0.41)  
395 on day 15. The cross-environmental correlation between days 0 and 8 was 0.79 (95% HDI:  
396 0.70, 0.88), between days 0 and 15 was 0.51 (95% HDI: 0.35, 0.68), and between days 8 and  
397 15 was 0.95 (95% HDI: 0.93, 0.97).

398 A one SD increase in the number of observations was associated with higher intercepts  
399 ( $\beta = 0.12$ ; 95% HDI: 0.03, 0.21; see [Supplementary Material Table S2](#)) and higher residual  
400 SDs ( $\beta = 0.06$ , 95% HDI: 0.02, 0.10). Increasing age by one SD was associated with lower  
401 intercepts ( $\beta = -0.61$ , 95% HDI: -0.70, -0.51), steeper linear slopes ( $\beta = -0.20$ , 95% HDI:  
402 -0.27, -0.13), a stronger quadratic curve ( $\beta = 0.07$ , 95% HDI: 0.03, 0.12), and larger residual  
403 SDs ( $\beta = 0.05$ , 95% HDI: 0.01, 0.09). Increasing weight by one SD was associated with  
404 shallower quadratic curves ( $\beta = -0.05$ , 95% HDI: -0.09, -0.01). No credible effect of sex was  
405 observed on personality, plasticity nor predictability. Gift dogs had larger intercepts than  
406 returned dogs ( $\beta_{diff} = 0.28$ , 95% HDI: 0.04, 0.52) and stray dogs ( $\beta_{diff} = 0.33$ , 95% HDI:  
407 0.15, 0.50), as well as steeper linear slopes ( $\beta_{diff} = -0.25$ , 95% HDI: -0.38, -0.13) and higher  
408 residual SDs than stray dogs ( $\beta_{diff} = 0.10$ , 95% HDI: 0.02, 0.18). Dogs at the large rehoming  
409 centre had steeper linear slopes ( $\beta_{diff} = -0.70$ , 95% HDI: -0.84, -0.56) and stronger quadratic  
410 curves ( $\beta_{diff} = 0.35$ , 95% HDI: 0.26, 0.45) than dogs at the medium rehoming centre, and  
411 lower intercept parameters ( $\beta_{diff} = -0.30$ , 95% HDI: -0.50, -0.09) and steeper linear slopes  
412 ( $\beta_{diff} = -0.22$ , 95% HDI: -0.38, -0.06) than dogs at the small rehoming centre. Compared to  
413 dogs at the small rehoming centre, dogs at the medium centre had lower intercepts ( $\beta_{diff} =$   
414 -0.25, 95% HDI: -0.48, -0.01), and shallower linear ( $\beta_{diff} = 0.48$ , 95% HDI: 0.30, 0.66) and  
415 quadratic slopes ( $\beta_{diff} = -0.34$ , 95% HDI: -0.46, -0.22). Dogs already neutered before arrival  
416 to the shelter had lower intercepts ( $\beta_{diff} = -0.54$ , 95% HDI: -1.07, -0.03) and lower residual



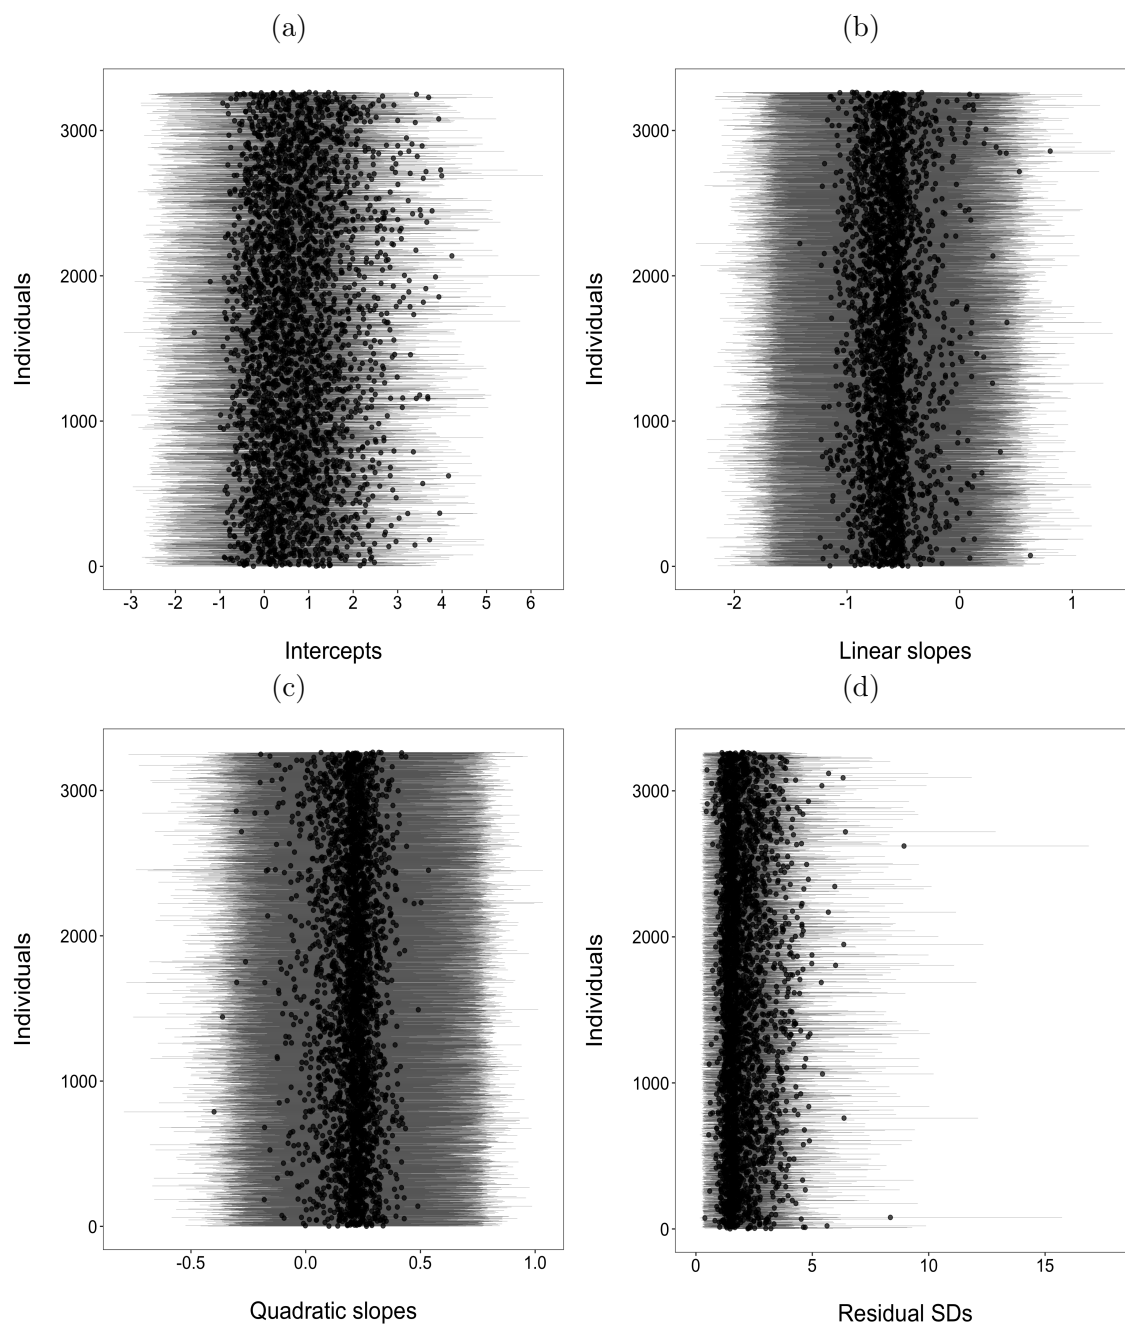

Figure 4: *Posterior means (black dots) and 95% highest density intervals (grey vertical lines) for each dogs' (a) intercept, (b) linear slope, (c) quadratic slope, and (d) residual SD parameter.*

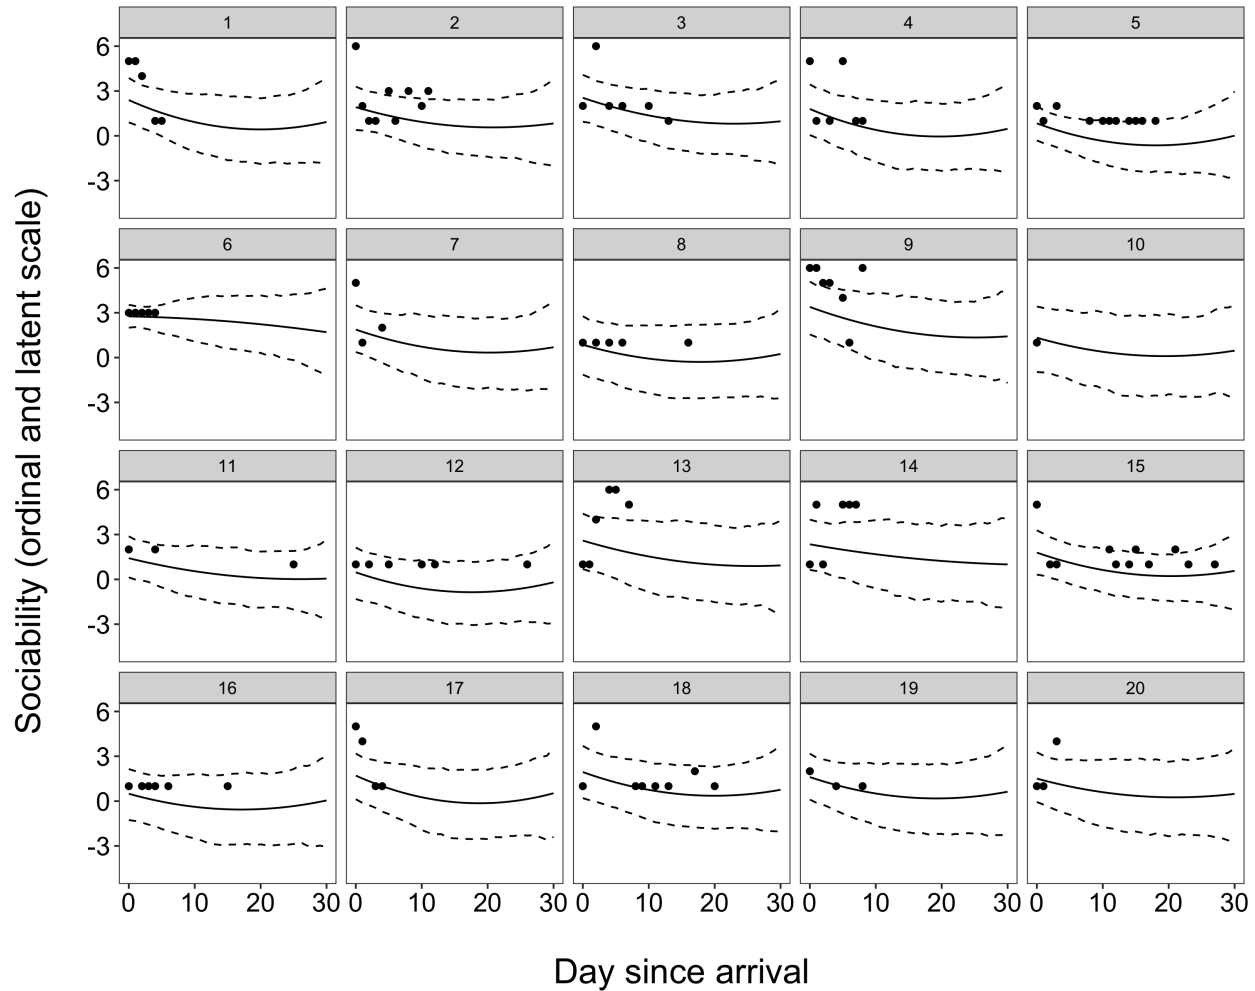

Figure 5: *Predicted reaction norms ('counterfactual' plots) for twenty randomly-selected dogs. Black points show raw data on the ordinal scale, where higher values indicate lower sociability, and solid and dashed lines illustrate posterior means and 95% highest density intervals (HDI). When data were sparse, there was increased uncertainty in model predictions. Due to hierarchical shrinkage, individual dogs' model predictions were pulled towards the group-level mean, particularly for those dogs showing higher behavioural codes (where higher values indicate lower sociability).*

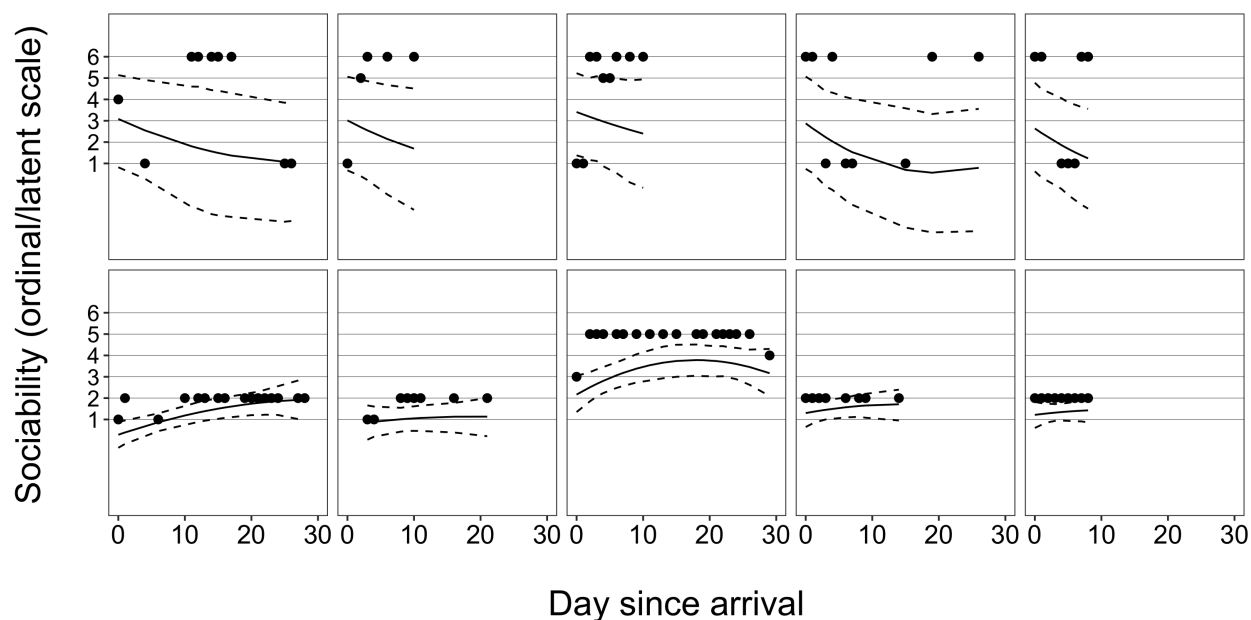

Figure 6: *Reaction norms (posterior means = solid black lines; 95% highest density intervals = dashed black lines) for individuals with the five highest (top row) and five lowest (bottom row) residual SDs. Black points represent raw data on the ordinal scale.*

417 SDs ( $\beta_{diff} = -0.53$ , 95% HDI: -0.85, -0.22) than dogs not neutered, but higher intercepts  
 418 ( $\beta_{diff} = 0.20$ , 95% HDI: 0.03, 0.37) and higher residual SDs ( $\beta_{diff} = 0.10$ , 95% HDI: 0.02,  
 419 0.19) than those neutered whilst at the shelter. Unneutered dogs had higher intercepts ( $\beta_{diff}$   
 420 = 0.74, 95% HDI: 0.20, 1.26) and higher residual SDs ( $\beta_{diff} = 0.63$ , 95% HDI: 0.30, 0.92)  
 421 than dogs neutered at the shelter.

## 422 4 Discussion

423 This study applied the framework of behavioural reaction norms to quantify inter- and intra-  
 424 individual differences in shelter dog behaviour during interactions with unfamiliar people.  
 425 This is the first study to systematically analyse behavioural data from a longitudinal, ob-  
 426 servational assessment of shelter dogs. Dogs demonstrated substantial individual differences  
 427 in personality, plasticity and predictability, which were not well described by simply investi-  
 428 gating how dogs behaved on average. In particular, accounting for individual differences in  
 429 predictability, or the short-term, day-to-day fluctuations in behaviour, resulted in significant  
 430 improvement in the analyses (Figure 2). Modelling dogs' longitudinal behaviour also demon-  
 431 strated behavioural repeatability increased with days since arrival, and that while individuals  
 432 maintained rank-order differences in sociability across smaller periods (e.g. one week), rank-  
 433 order differences were only moderately maintained between arrival to the shelter and day  
 434 15. The results highlight the importance of adopting observational and longitudinal assess-  
 435 ments of shelter dog behaviour [24], provide a method by which to analyse longitudinal data  
 436 commensurate with other work in animal behaviour, and identify previously unconsidered  
 437 behavioural measures that could be used to improve the predictive validity of behavioural

438 assessments in dogs.

## 439 4.1 Average behaviour

440 At the group-level, dogs' reactions to meeting unfamiliar people were predominantly coded  
441 as *Friendly* (Figure 3a), described as 'Dog initiates interactions in an appropriate social man-  
442 ner'. Although this definition is broad, it represents a functional qualitative characterisation  
443 of behaviour suitable for the purposes of the shelter when coding behavioural interactions,  
444 and its generality may partly explain why it was the most prevalent category. The results  
445 are consistent with findings that behaviours indicative of poor welfare and/or difficulty of  
446 managing (e.g. aggression) are relatively infrequent even in the shelter environment [22, 26].  
447 The change of behaviour across days since arrival was characterised by an increase in the  
448 *Friendly* code and a decrease in other behavioural codes (Figure 3a). Furthermore, the posi-  
449 tive quadratic effect of day since arrival on sociability illustrates that the rate of behavioural  
450 change was not constant across days, being quickest earlier after arrival (Figure 3b). The  
451 range of behavioural change at the group-level was, nevertheless, still concentrated around  
452 the lowest behavioural codes, *Friendly* and *Excitable*.

453 Previous studies provide conflicting evidence regarding how shelter dogs adapt to the  
454 kennel environment over time, including behavioural and physiological profiles indicative  
455 of both positive and negative welfare [26]. Whereas some authors report decreases in the  
456 prevalence of some stress- and/or fear related behaviour with time [27, 49], others have  
457 reported either no change or an increase in behaviours indicative of poor welfare [17, 30].  
458 Of relevance here, Kis *et al.* [17] found that aggression towards unknown people increased  
459 over the first two weeks of being at a shelter. Here, aggression was rare (Table 2), and  
460 the probability of 'red codes' (which included aggression) decreased with days at the shelter  
461 (Figure 3a). A salient difference between the latter study and the one reported here is that  
462 Kis *et al.* [17] collected data using a standardised behavioural test consisting of a stranger  
463 engaging in a 'threatening approach' towards dogs. By contrast, we used a large data set of  
464 behavioural observations recorded after non-standardised, spontaneous interactions between  
465 dogs and unfamiliar people. In recording spontaneous interactions, the shelter aimed to elicit  
466 behaviour more representative of a dog's typical behaviour outside of the shelter environment  
467 than would be seen in a standardised behavioural assessment. Previously, authors have noted  
468 that standardised behavioural assessments may induce stress to individuals and inflate the  
469 chances of dogs displaying aggression [29], emphasising the need for observational methods  
470 of assessment in shelters [24]. While such observational methods are less standardised, they  
471 may have greater ecological validity by giving results more representative of how dogs will  
472 behave outside of the shelter. Testing the predictive value of observational assessments on  
473 behaviour post-adoption is the focus of future research.

## 474 4.2 Individual-level variation

475 When behavioural data are aggregated across individuals, results may provide a poor repre-  
476 sentation of how individuals in a sample actually behaved. Here, we found heterogeneity in  
477 dog behaviour across days since arrival, even after taking into account a number of dog-level  
478 predictor variables that could explain inter-individual differences. Variation in individuals'

479 average behaviour across days (i.e. variation in dogs' intercept estimates) illustrated that  
480 personality estimates spanned a range of behavioural codes, although model predictions were  
481 mostly focused on the green codes (Figure 3b; Table 2). However, whilst there were many  
482 records to inform group-level estimates, there were considerably fewer records available for  
483 each individual, which resulted in large uncertainty of individual personality parameters (il-  
484 lustrated by wide 95% HDI bars in Figure 4a). Personality variation has been the primary  
485 focus of previous analyses of individual differences in dogs, often based on data collected  
486 at one time point and usually on a large number of behavioural variables that require re-  
487 duction into composite or latent variables (e.g. [50–52]). Our results highlight that ranking  
488 individuals on personality dimensions from few observations entails substantial uncertainty.

489 Certain studies on dog personality have explored how personality trait scores change  
490 across time periods, such as ontogeny (e.g. [53]) or time at a shelter (e.g. [17]). Such  
491 analyses assume, however, that individuals have similar degrees of change through time. If  
492 individuals differ in the magnitude or direction of change (i.e. different degrees of plasticity),  
493 group-level patterns of change may not capture important individual heterogeneity. In this  
494 study, most dogs were likely to show lower behavioural codes/more sociable responses across  
495 days since arrival, although the rate of linear and quadratic change differed among dogs.  
496 Indeed, some dogs showed a *decrease* in sociability through time (individuals with positive  
497 model estimates in Figure 4b), and while most dogs showed greater behavioural change early  
498 after arrival, others showed slower behavioural change early after arrival (individuals with  
499 negative model estimates in Figure 4c). As with estimates of personality, there was also  
500 large uncertainty of plasticity.

501 Part of the difficulty of estimating reaction norms for heterogeneous data is choosing a  
502 function that best describes behavioural change. We used both linear and quadratic effects  
503 of day since arrival based on preliminary plots of the data, supported by lower WAIC values  
504 compared to a model with just a linear effect of day since arrival (alternative model 3 versus  
505 4 in Figure 2). Low-order polynomial functions were also relatively easy to vary across  
506 individuals while maintaining interpretability of the results. Most studies are, nevertheless,  
507 constrained to first-order polynomial reaction norms through time due to collecting data  
508 at only a few time points [6, 44], and even higher-order polynomial functions may only  
509 produce crude representations of data-generating processes [33]. More complex functions  
510 (e.g. regression splines), on the other hand, have the disadvantage of being less easily  
511 interpretable. By collecting data more intensely, the opportunities to model behavioural  
512 reaction norms with biologically-informed functions of contexts and time should improve.  
513 For instance, the rise of ecological momentary assessment studies in psychology has allowed  
514 greater possibilities in the modelling of behaviour as a dynamic system (e.g. [54, 55]).

515 Personality and plasticity were correlated, with dogs with less sociable behaviour across  
516 days being less plastic. Previous studies have explored the relationship between how individ-  
517 uals behave on average and their degree of behavioural change. David *et al.* [56] found that  
518 male golden hamsters (*Mesocricetus auratus*) showing high levels of aggression in a social  
519 intruder paradigm were slower in adapting to a delayed-reward paradigm. In practice, the  
520 relationship between personality and plasticity is probably context dependent. Betini and  
521 Norris [57] found, for instance, that more aggressive male tree swallows (*Tachycineta bicolor*)  
522 during nest defence were more plastic in response to variation in temperature, but that plas-  
523 ticity was only advantageous for nonaggressive males and no relationship was present between

524 personality and plasticity in females. The correlation between personality and plasticity in-  
525 dicates a ‘fanning out’ shape of the reaction norms through time (Figure 3b). Consequently,  
526 behavioural repeatability increased as a function of day. The ‘cross-environmental’ correla-  
527 tion, moreover, indicated that the most sociable dogs on arrival day were not necessarily the  
528 most sociable on later days at the shelter. In particular, the correlation between sociabil-  
529 ity scores on arrival day and day 15 was only moderate, supporting Brommer [44] that the  
530 rank-ordering of trait scores is not always reliable. By contrast, the cross-environmental cor-  
531 relation between days 0 and 8, and 8 and day 15 were much stronger. These results suggest  
532 that shelters using standardised behavioural assessments would benefit from administering  
533 such tests as late as possible after dogs arrive.

534 Of particular interest was predictability or the variation in dogs’ residual SDs. Pre-  
535 dictability has received little attention in research on (shelter) dogs although some have  
536 posited that dogs may vary in their behavioural consistency (e.g. [13]). Distinguishing be-  
537 tween inter- and intra-individual variation, as done here, is key to testing this hypothesis.  
538 Modelling residual SDs for each dog resulted in a model with markedly better out-of-sample  
539 predictive accuracy (Figure 2). The coefficient of variation for predictability was 0.64 (95%  
540 HDI: 0.58, 0.70), which is high compared to other studies in animal behaviour. For instance,  
541 Mitchell *et al.* [6] reported a value of 0.43 (95% HDI: 0.36, 0.53) in spontaneous activity  
542 measurements of male guppies (*Poecilia reticulata*). Variation in predictability also supports  
543 the hypothesis that dogs have varying levels of behavioural consistency. It is important to  
544 note, however, that interactions with unfamiliar people at the shelter were likely more het-  
545 erogeneous than behavioural measures from standardised tests or laboratory environments,  
546 which may contribute to greater individual variation in predictability. Moreover, the be-  
547 havioural data here may have contained more measurement error than more standardised  
548 environments. Although shelter employees demonstrated significant inter-rater reliability in  
549 video coding sessions, the average proportion of shelter employees who selected the correct  
550 behavioural code to describe behaviours seen in videos was only 66%, while 78% chose a  
551 video in the correct colour category (green, amber or red). For observational methods in  
552 shelters, it is essential to evaluate the reliability and validity of behavioural records since the  
553 observational contexts will be less standardised. Defining acceptable standards of reliability  
554 and validity is, however, non-trivial and we could not find measures of reliability or validity  
555 in any of the previous studies investigating predictability in animals for comparison.

556 Dogs with higher residual SDs demonstrated steeper linear slopes and greater quadratic  
557 curves, indicating that greater plasticity was associated with lower predictability. The costs  
558 of plasticity are believed to include greater phenotypic instability, in particular developmen-  
559 tal instability [11, 58]. Since more plastic individuals are more responsive to environmental  
560 perturbation, a limitation of plasticity may be greater phenotypic fluctuation on finer time  
561 scales. However, lower predictability may also confer a benefit to individuals precisely be-  
562 cause they are less predictable to con- and hetero-specifics. For instance, Highcock and Carter  
563 [59] reported that predictability in behaviour decreases under predation risk in Namibian  
564 rock agamas (*Agama planiceps*). No correlation was found here between personality and  
565 predictability, similar to findings of Biro and Adriaenssens [2] in mosquitofish (*Gambusia*  
566 *holbrooki*), although correlations were found in agamas [59] and guppies [6].



### 567 4.3 Predictors of individual variation

568 Finally, we found associations between certain predictor variables and personality, plasticity  
569 and predictability (Table S2). Our primary reason for including these predictor variables  
570 was to obtain more accurate estimates of personality, plasticity and predictability, and we  
571 remain cautious about *a posteriori* interpretations of their effects, especially since the theory  
572 underlying why individuals may, for example, demonstrate differences in predictability is  
573 in its infancy [8]. The reproducibility of a number of the results would, nevertheless, be  
574 interesting to confirm in future research. In particular, understanding factors affecting intra-  
575 individual change is important since many personality assessments are used to predict an  
576 individual's future behaviour, rather than understand inter-individual differences. Here,  
577 increasing age was associated with greater plasticity (linear and quadratic change) and lower  
578 predictability, although some of the parameters' 95% HDIs were close to zero, indicative of  
579 small effects. In great tits (*Parus major*) conversely, plasticity decreased with age [60], whilst  
580 in humans, intra-individual variability in reaction times increased with age [61]. Moreover,  
581 non-neutered dogs showed lower predictability than neutered dogs, and dogs entering the  
582 shelter as gifts (relinquished by their owners) had lower predictability estimates than stray  
583 dogs (dogs brought in by local authorities or members of the public after being found without  
584 their owners). Although these results can be used to formulate specific hypotheses about  
585 behavioural variation, researchers should beware of making generalisations based on inter-  
586 individual differences without first assessing the amount of individual-level heterogeneity.

## 587 5 Conclusion

588 We applied the framework of behavioural reactions norms to data from a longitudinal and  
589 observational shelter dog behavioural assessment, quantifying inter- and intra-individual be-  
590 havioural variation in dogs' interactions with unfamiliar people. Overall, shelter dogs were  
591 sociable with unfamiliar people and sociability continued to increase with days since arrival  
592 to the shelter. At the same time, dogs showed individual differences in personality, plasticity  
593 and predictability. Accounting for all of these components substantially improved the analy-  
594 ses, particularly the inclusion of predictability, which suggests that individual differences in  
595 day-to-day behavioural variation is an important, yet largely unstudied, component of dog  
596 behaviour. Our results also highlight the uncertainty of making predictions on shelter dog  
597 behaviour, particularly when the number of behavioural observations is low. For shelters  
598 conducting standardised behavioural assessments, assessments are likely best carried out as  
599 late as possible, given that rank-order differences between individuals were only moderately  
600 related between arrival and at day 15. In conclusion, this study supports moving towards  
601 observational and longitudinal assessments of shelter dog behaviour, has demonstrated a  
602 Bayesian method by which to analyse longitudinal data on dog behaviour, and suggests that  
603 the predictive validity of behavioural assessments in dogs could be improved by systemati-  
604 cally accounting for both inter- and intra-individual variation.

## 605 **6 Ethics statement**

606 Full permission to use the data in this article was provided by Battersea Dogs and Cats  
607 Home.

## 608 **7 Data accessibility**

609 The data, R code and Stan model code to run the analyses and produce the results and figures  
610 in this article are available on Github: [https://github.com/ConorGoold/GooldNewberry\\_](https://github.com/ConorGoold/GooldNewberry_modelling_shelter_dog_behaviour)  
611 [modelling\\_shelter\\_dog\\_behaviour](https://github.com/ConorGoold/GooldNewberry_modelling_shelter_dog_behaviour)

## 612 **8 Competing interests**

613 We declare no competing interests.

## 614 **9 Author contributions**

615 CG and RCN conceptualised the study. CG obtained the data, conducted the statistical  
616 analyses and drafted the initial manuscript. CG and RCN revised the manuscript and wrote  
617 the final version.

## 618 **10 Acknowledgements**

619 The authors are especially grateful to Battersea Dogs and Cats Home for providing the data  
620 on their behavioural assessment.

## 621 **11 Funding statement**

622 CG and RCN are employed by the Norwegian University of Life Sciences. No additional  
623 funding was required for this study.

## 624 **References**

- 625 [1] Bell AM, Hankison SJ, Laskowski KL. 2009. The repeatability of behaviour: a meta-  
626 analysis. *Anim. Behav.* **77**, 771–783. doi: [10.1016/j.anbehav.2008.12.022](https://doi.org/10.1016/j.anbehav.2008.12.022).
- 627 [2] Biro PA, Adriaenssens B. 2013. Predictability as a personality trait: consistent differ-  
628 ences in intraindividual behavioral variation. *Am. Nat.* **182**, 621–629. doi: [10.1086/](https://doi.org/10.1086/673213)  
629 [673213](https://doi.org/10.1086/673213).
- 630 [3] Dingemans NJ, Kazem AJN, Réale D, Wright J. 2010. Behavioural reaction norms:  
631 animal personality meets individual plasticity. *Trends Ecol. Evol.* **25**, 81–89. doi: [10.](https://doi.org/10.1016/j.tree.2009.07.013)  
632 [1016/j.tree.2009.07.013](https://doi.org/10.1016/j.tree.2009.07.013).

- 633 [4] Bridger D, Bonner SJ, Briffa M. 2015. Individual quality and personality: bolder  
634 males are less fecund in the hermit crab (*Pagurus bernhardus*). *Proc. R. Soc. B* **282**,  
635 20142492. doi: [10.1098/rspb.2014.2492](https://doi.org/10.1098/rspb.2014.2492).
- 636 [5] Cleasby IR, Nakagawa S, Schielzeth H. 2015. Quantifying the predictability of be-  
637 haviour: statistical approaches for the study of between-individual variation in the  
638 within-individual variance. *Methods Ecol. Evol.* **6**, 27–37. doi: [10.1111/2041-210X.](https://doi.org/10.1111/2041-210X.12281)  
639 [12281](https://doi.org/10.1111/2041-210X.12281).
- 640 [6] Mitchell DJ, Fanson BG, Beckmann C, Biro PA. 2016. Towards powerful experimental  
641 and statistical approaches to study intraindividual variability in labile traits. *R. Soc.*  
642 *Open Sci.* **3**, 160352. doi: [10.1098/rsos.160352](https://doi.org/10.1098/rsos.160352).
- 643 [7] Stamps JA, Briffa M, Biro PA. 2012. Unpredictable animals: individual differences in  
644 intraindividual variability (IIV). *Anim. Behav.* **83**, 1325–1334. doi: [10.1016/j.anbehav.](https://doi.org/10.1016/j.anbehav.2012.02.017)  
645 [2012.02.017](https://doi.org/10.1016/j.anbehav.2012.02.017).
- 646 [8] Westneat DF, Wright J, Dingemans NJ. 2015. The biology hidden inside residual  
647 within-individual phenotypic variation. *Biol. Rev.* **90**, 729–743. doi: [10.1111/brv.12131](https://doi.org/10.1111/brv.12131).
- 648 [9] DeWitt TJ. 2016. Expanding the phenotypic plasticity paradigm to broader views of  
649 trait space and ecological function. *Curr. Zool.* **62**, 463–473. doi: [10.1093/cz/zow085](https://doi.org/10.1093/cz/zow085).
- 650 [10] Scheiner SM. 2014. The genetics of phenotypic plasticity. XIII. Interactions with de-  
651 velopmental instability. *Ecol. Evol.* **4**, 1347–1360. doi: [10.1002/ece3.1039](https://doi.org/10.1002/ece3.1039).
- 652 [11] Tonsor SJ, Elnaccash TW, Scheiner SM. 2013. Developmental instability is genetically  
653 correlated with phenotypic plasticity, constraining heritability, and fitness. *Evolution*  
654 **67**, 2923–2935. doi: [10.1111/evo.12175](https://doi.org/10.1111/evo.12175).
- 655 [12] Oates AC. 2011. What’s all the noise about developmental stochasticity? *Development*  
656 **138**, 601–607. doi: [10.1242/dev.059923](https://doi.org/10.1242/dev.059923).
- 657 [13] Fratkin JL, Sinn DL, Patall EA, Gosling SD. 2013. Personality consistency in dogs: a  
658 meta-analysis. *PLoS ONE* **8**, e54907. doi: [10.1371/journal.pone.0054907](https://doi.org/10.1371/journal.pone.0054907).
- 659 [14] Wilsson E, Sundgren PE. 1998. Behaviour test for eight-week old puppies—heritabilities  
660 of tested behaviour traits and its correspondence to later behaviour. *Appl. Anim. Be-*  
661 *haviour. Sci.* **58**, 151–162. doi: [10.1016/S0168-1591\(97\)00093-2](https://doi.org/10.1016/S0168-1591(97)00093-2).
- 662 [15] Sinn DL, Gosling SD, Hilliard S. 2010. Personality and performance in military working  
663 dogs: reliability and predictive validity of behavioral tests. *Appl. Anim. Behav. Sci.*  
664 **127**, 51–65. doi: [10.1016/j.applanim.2010.08.007](https://doi.org/10.1016/j.applanim.2010.08.007).
- 665 [16] Riemer S, Müller C, Virányi Z, Huber L, Range F. 2014. The predictive value of early  
666 behavioural assessments in pet dogs – a longitudinal study from neonates to adults.  
667 *PLoS ONE* **9**, e101237. doi: [10.1371/journal.pone.0101237](https://doi.org/10.1371/journal.pone.0101237).
- 668 [17] Kis A, Klausz B, Persa E, Miklósi Á, Gácsi M. 2014. Timing and presence of an  
669 attachment person affect sensitivity of aggression tests in shelter dogs. *Vet. Rec.* **174**,  
670 196. doi: [10.1136/vr.101955](https://doi.org/10.1136/vr.101955).
- 671 [18] Serpell JA, Duffy DL. 2016. Aspects of juvenile and adolescent environment predict  
672 aggression and fear in 12-month-old guide dogs. *Front. Vet. Sci.* **3**. doi: [10.3389/fvets.](https://doi.org/10.3389/fvets.2016.00049)  
673 [2016.00049](https://doi.org/10.3389/fvets.2016.00049).
- 674 [19] Robinson LM, Thompson RS, Ha JC. 2016. Puppy temperament assessments predict  
675 breed and American Kennel Club group but not adult temperament. *J. Appl. Anim.*  
676 *Welf. Sci.* **19**, 101–114. doi: [10.1080/10888705.2015.1127765](https://doi.org/10.1080/10888705.2015.1127765).

- 677 [20] Marder AR, Shabelansky A, Patronek GJ, Dowling-Guyer S, D'Arpino SS. 2013. Food-  
678 related aggression in shelter dogs: a comparison of behavior identified by a behavior  
679 evaluation in the shelter and owner reports after adoption. *Appl. Anim. Behav. Sci.*  
680 **148**, 150–156. doi: [10.1016/j.applanim.2013.07.007](https://doi.org/10.1016/j.applanim.2013.07.007).
- 681 [21] Mohan-Gibbons H, Weiss E, Slater M. 2012. Preliminary investigation of food guarding  
682 behavior in shelter dogs in the United States. *Animals* **2**, 331–346. doi: [10.3390/  
683 ani2030331](https://doi.org/10.3390/ani2030331).
- 684 [22] Mornement KM, Coleman GJ, Toukhsati SR, Bennett PC. 2015. Evaluation of the  
685 predictive validity of the Behavioural Assessment for Re-homing K9's (B.A.R.K.) pro-  
686 tocol and owner satisfaction with adopted dogs. *Appl. Anim. Behav. Sci.* **167**, 35–42.  
687 doi: [10.1016/j.applanim.2015.03.013](https://doi.org/10.1016/j.applanim.2015.03.013).
- 688 [23] Poulsen AH, Lisle AT, Phillips CJC. 2010. An evaluation of a behaviour assessment to  
689 determine the suitability of shelter dogs for rehoming. *Vet. Med. Int.* **2010**, e523781.  
690 doi: [10.4061/2010/523781](https://doi.org/10.4061/2010/523781).
- 691 [24] Rayment DJ, Groef BD, Peters RA, Marston LC. 2015. Applied personality assessment  
692 in domestic dogs: limitations and caveats. *Appl. Anim. Behav. Sci.* **163**, 1–18. doi:  
693 [10.1016/j.applanim.2014.11.020](https://doi.org/10.1016/j.applanim.2014.11.020).
- 694 [25] Hennessy MB. 2013. Using hypothalamic–pituitary–adrenal measures for assessing and  
695 reducing the stress of dogs in shelters: a review. *Appl. Anim. Behav. Sci.* **149**, 1–12.  
696 doi: [10.1016/j.applanim.2013.09.004](https://doi.org/10.1016/j.applanim.2013.09.004).
- 697 [26] Protopopova A. 2016. Effects of sheltering on physiology, immune function, behavior,  
698 and the welfare of dogs. *Physiol. Behav.* **159**, 95–103. doi: [10.1016/j.physbeh.2016.03.  
699 020](https://doi.org/10.1016/j.physbeh.2016.03.020).
- 700 [27] Stephen JM, Ledger RA. 2005. An audit of behavioral indicators of poor welfare in  
701 kennelled dogs in the United Kingdom. *J. Appl. Anim. Welf. Sci.* **8**, 79–95. doi: [10.  
702 1207/s15327604jaws0802\\_1](https://doi.org/10.1207/s15327604jaws0802_1).
- 703 [28] Rooney NJ, Gaines SA, Bradshaw JWS. 2007. Behavioural and glucocorticoid re-  
704 sponses of dogs (*Canis familiaris*) to kennelling: investigating mitigation of stress by  
705 prior habituation. *Physiol. Behav.* **92**, 847–854. doi: [10.1016/j.physbeh.2007.06.011](https://doi.org/10.1016/j.physbeh.2007.06.011).
- 706 [29] Patronek GJ, Bradley J. 2016. No better than flipping a coin: reconsidering canine  
707 behavior evaluations in animal shelters. *J. Vet. Behav.* **15**, 66–77. doi: [10.1016/j.jveb.  
708 2016.08.001](https://doi.org/10.1016/j.jveb.2016.08.001).
- 709 [30] Protopopova A, Wynne CDL. 2014. Adopter-dog interactions at the shelter: behavioral  
710 and contextual predictors of adoption. *Appl. Anim. Behav. Sci.* **157**, 109–116. doi:  
711 [10.1016/j.applanim.2014.04.007](https://doi.org/10.1016/j.applanim.2014.04.007).
- 712 [31] Martin JGA, Pirottay E, Petellez MB, Blumstein DT. 2017. Genetic basis of between-  
713 individual and within-individual variance of docility. *J. Evol. Biol.* **30**. doi: [10.1111/  
714 jeb.13048](https://doi.org/10.1111/jeb.13048).
- 715 [32] Kruschke JK. 2014. *Doing Bayesian Data Analysis: A Tutorial with R, JAGS, and*  
716 *Stan*. Academic Press.
- 717 [33] McElreath R. 2015. *Statistical Rethinking: A Bayesian Course with Examples in R and*  
718 *Stan*. CRC Press.
- 719 [34] Voith VL et al. 2013. Comparison of visual and DNA breed identification of dogs and  
720 inter-observer reliability. *Am. J. Sociol.* **3**, 17–29. doi: [10.1080/10888700902956151](https://doi.org/10.1080/10888700902956151).

- 721 [35] Goold C, Newberry RC. 2017. Aggressiveness as a latent personality trait of domestic  
722 dogs: testing local independence and measurement invariance. *bioRxiv*. doi: [10.1101/  
723 117440](https://doi.org/10.1101/117440).
- 724 [36] Owczarczak-Garstecka SC, Burman OH. 2016. Can sleep and resting behaviours be  
725 used as indicators of welfare in shelter dogs (*Canis lupus familiaris*)? *PLoS ONE* **11**,  
726 e0163620. doi: <https://doi.org/10.1371/journal.pone.0163620>.
- 727 [37] R Development Core Team. 2016. *R: a language and environment for statistical com-  
728 puting*. Vienna, Austria.
- 729 [38] Tastle WJ, Wierman MJ. 2007. Consensus and dissent: a measure of ordinal dis-  
730 persion. *Int. J. Approx. Reason.* **45**, 531–545. doi: [10.1016/j.ijar.2006.06.024](https://doi.org/10.1016/j.ijar.2006.06.024).
- 731 [39] Ruedin D. 2016. *agrmt: calculate agreement or consensus in ordered rating scales*. R  
732 package version 1.40.4.
- 733 [40] Liddell TM, Kruschke JK. 2015. Analyzing ordinal data: support for a Bayesian ap-  
734 proach. *SSRN*. doi: <http://dx.doi.org/10.2139/ssrn.2692323>.
- 735 [41] Foulley JL, Jaffrézic F. 2010. Modelling and estimating heterogeneous variances in  
736 threshold models for ordinal discrete data via Winbugs/Openbugs. *Comput. Methods  
737 Programs Biomed.* **97**, 19–27. doi: [10.1016/j.cmpb.2009.05.004](https://doi.org/10.1016/j.cmpb.2009.05.004).
- 738 [42] Kizilkaya K, Tempelman RJ. 2005. A general approach to mixed effects modeling of  
739 residual variances in generalized linear mixed models. *Genet. Sel. Evol.* **37**, 31. doi:  
740 [10.1186/1297-9686-37-1-31](https://doi.org/10.1186/1297-9686-37-1-31).
- 741 [43] Nakagawa S, Schielzeth H. 2010. Repeatability for gaussian and non-gaussian data: a  
742 practical guide for biologists. *Biol. Rev.* **85**, 935–956. doi: [10.1111/j.1469-185X.2010.  
743 00141.x](https://doi.org/10.1111/j.1469-185X.2010.00141.x).
- 744 [44] Brommer JE. 2013. Variation in plasticity of personality traits implies that the ranking  
745 of personality measures changes between environmental contexts: calculating the cross-  
746 environmental correlation. *Behav. Ecol. Sociobiol.* **67**, 1709–1718. doi: [10.1007/s00265-  
747 013-1603-9](https://doi.org/10.1007/s00265-013-1603-9).
- 748 [45] Stan Development Team. 2016a. *Stan Modeling Language Users Guide and Reference  
749 Manual*. Version 2.15.0.
- 750 [46] Lewandowski D, Kurowicka D, Joe H. 2009. Generating random correlation matrices  
751 based on vines and extended onion method. *J. Multivar. Anal.* **100**, 1989–2001. doi:  
752 [10.1016/j.jmva.2009.04.008](https://doi.org/10.1016/j.jmva.2009.04.008).
- 753 [47] Watanabe S. 2010. Asymptotic equivalence of Bayes cross validation and widely ap-  
754 plicable information criterion in singular learning theory. *J. Mach. Learn. Res.* **11**,  
755 3571–3594. url: <http://www.jmlr.org/papers/v11/watanabe10a.html>.
- 756 [48] Stan Development Team. 2016b. *RStan: the R interface to Stan*. R package version  
757 2.14.1.
- 758 [49] Hiby EF, Rooney NJ, Bradshaw JWS. 2006. Behavioural and physiological responses of  
759 dogs entering re-homing kennels. *Physiol. Behav.* **89**, 385–391. doi: [10.1016/j.physbeh.  
760 2006.07.012](https://doi.org/10.1016/j.physbeh.2006.07.012).
- 761 [50] Svartberg K, Forkman B. 2002. Personality traits in the domestic dog (*Canis famil-  
762 iaris*). *Appl. Anim. Behav. Sci.* **79**, 133–155. doi: [10.1016/S0168-1591\(02\)00121-1](https://doi.org/10.1016/S0168-1591(02)00121-1).
- 763 [51] Hsu Y, Serpell JA. 2003. Development and validation of a questionnaire for measuring  
764 behavior and temperament traits in pet dogs. *J. Am. Vet. Med. Assoc.* **223**, 1293–1300.  
765 doi: [10.2460/javma.2003.223.1293](https://doi.org/10.2460/javma.2003.223.1293).



- 766 [52] Jones AC, Gosling SD. 2005. Temperament and personality in dogs (*Canis familiaris*):  
767 a review and evaluation of past research. *Appl. Anim. Behav. Sci.* **95**, 1–53. doi: [10.1016/j.applanim.2005.04.008](https://doi.org/10.1016/j.applanim.2005.04.008).  
768
- 769 [53] Riemer S, Müller C, Virányi Z, Huber L, Range F. 2016. Individual and group level  
770 trajectories of behavioural development in Border collies. *Appl. Anim. Behav. Sci.* **180**,  
771 78–86. doi: [10.1016/j.applanim.2016.04.021](https://doi.org/10.1016/j.applanim.2016.04.021).
- 772 [54] Cramer AOJ, Borkulo CD van, Giltay EJ, Maas HLJ van der, Kendler KS, Scheffer M,  
773 Borsboom D. 2016. Major Depression as a complex dynamic system. *PLoS ONE* **11**,  
774 e0167490. doi: [10.1371/journal.pone.0167490](https://doi.org/10.1371/journal.pone.0167490).
- 775 [55] Wichers M, Groot PC, Psychosystems, ESM Group, EWS Group. 2016. Critical slow-  
776 ing down as a personalized early warning signal for depression. *Psychother. Psychosom.*  
777 **85**, 114–116. doi: [10.1159/000441458](https://doi.org/10.1159/000441458).
- 778 [56] David JT, Cervantes MC, Trosky KA, Salinas JA, Delville Y. 2004. A neural network  
779 underlying individual differences in emotion and aggression in male golden hamsters.  
780 *Neuroscience* **126**, 567–578. doi: [10.1016/j.neuroscience.2004.04.031](https://doi.org/10.1016/j.neuroscience.2004.04.031).
- 781 [57] Betini GS, Norris DR. 2012. The relationship between personality and plasticity in  
782 tree swallow aggression and the consequences for reproductive success. *Anim. Behav.*  
783 **83**, 137–143. doi: [10.1016/j.anbehav.2011.10.018](https://doi.org/10.1016/j.anbehav.2011.10.018).
- 784 [58] Dewitt TJ, Sih A, Wilson DS. 1998. Costs and limits of phenotypic plasticity. *Trends*  
785 *Ecol. Evol.* **13**, 77–81. doi: [10.1016/S0169-5347\(97\)01274-3](https://doi.org/10.1016/S0169-5347(97)01274-3).
- 786 [59] Highcock L, Carter AJ. 2014. Intraindividual variability of boldness is repeatable across  
787 contexts in a wild lizard. *PLoS ONE* **9**, e95179. doi: [10.1371/journal.pone.0095179](https://doi.org/10.1371/journal.pone.0095179).
- 788 [60] Araya-Ajoy YG, Dingemans NJ. 2017. Repeatability, heritability, and age-dependence  
789 of seasonal plasticity in aggressiveness in a wild passerine bird. *J. Anim. Ecol.* **86**, 227–  
790 238. doi: [10.1111/1365-2656.12621](https://doi.org/10.1111/1365-2656.12621).
- 791 [61] Dykiert D, Der G, Starr JM, Deary IJ. 2012. Age differences in intra-individual vari-  
792 ability in simple and choice reaction time: systematic review and meta-analysis. *PLOS*  
793 *ONE* **7**, e45759. doi: [10.1371/journal.pone.0045759](https://doi.org/10.1371/journal.pone.0045759).
